# Supplementary material
Source: HighWire-hosted journal article supplement (https://jnm.snmjournals.org/highwire/filestream/95554/field_highwire_adjunct_files/0/232686_Supplemental_Data.pdf)
Supplement: 232686_Supplemental_Data.pdf [file 232686_Supplemental_Data.pdf]

Supplemental Figure 1.

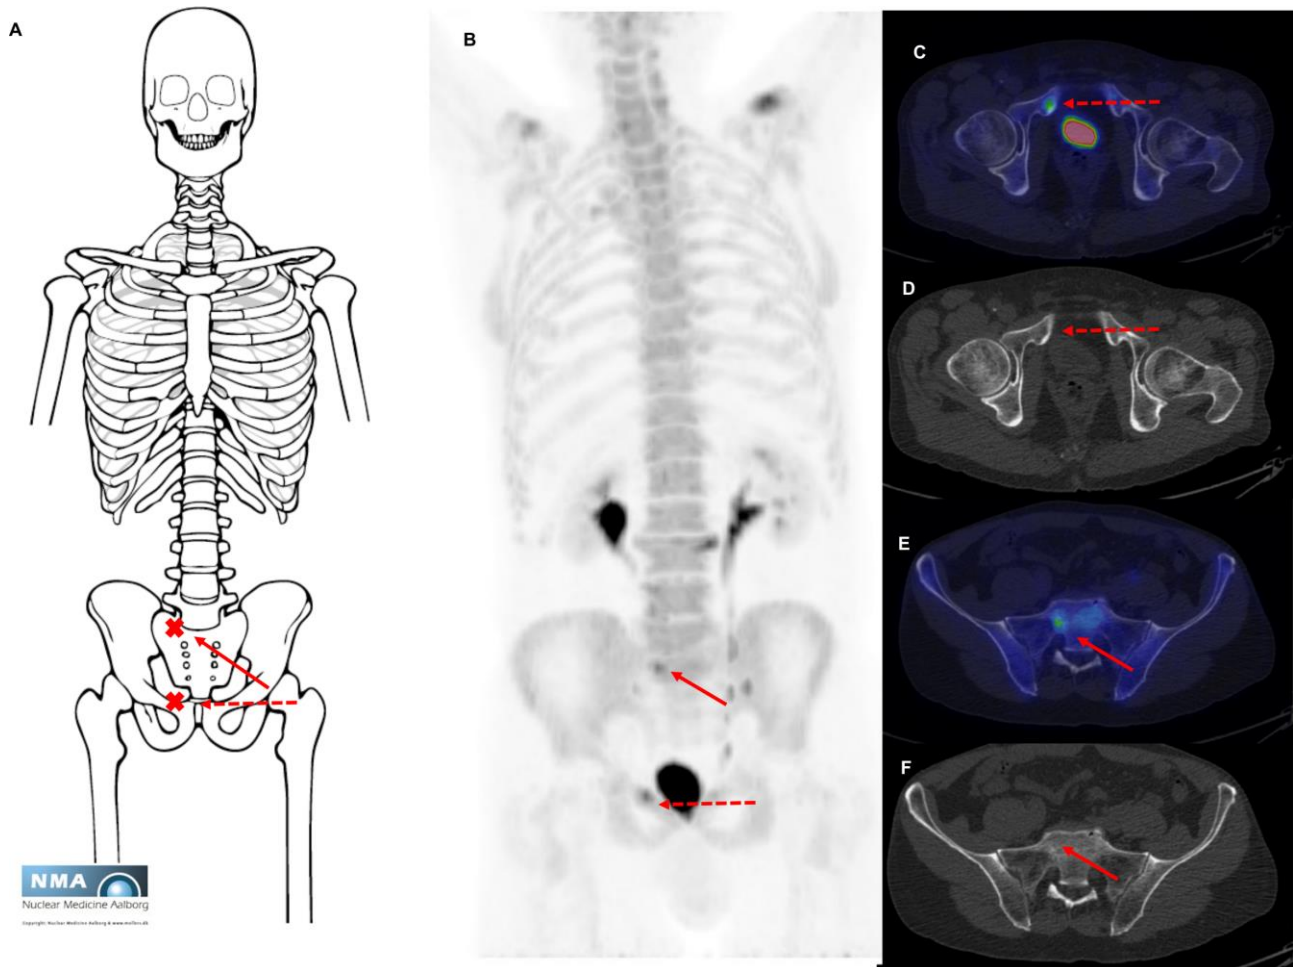

An example of disagreement on a patient level between the reviewers: One observer considered the patient M1 with two bone metastases, whereas, the other observer considered the same two lesions equivocal. The schematic drawing used to report the findings is shown in (A) with the two marks in red assigned by one of the observer and the corresponding maximum NaF PET intensity projection (B). The dotted arrow (in A and B) shows the lesion in the pubic bone with corresponding axial fused image in (C) and low dose CT in (D). The full arrow (in A and B) shows the lesion in the sacral bone with corresponding axial fused image (E) and low dose CT (F). No corresponding changes in CT was seen for any of the lesions, which may in part explain the difference in interpretation. Illustration (A) is copyright of Nuclear Medicine Aalborg, printed with permission of Nuclear Medicine Aalborg.

Supplemental Table 1. Detailed description of the 19 subjects where the readers disagree on the skeletal status.

| Patient number | Stage of PCa at the time of NaF PET/CT | PSA (ng/mL) | Age (years) | Gleason score | Clinical T-stage | NaF-PET/CT 3- point scale* Observer 1 | NaF-PET/CT 3- point scale* Observer 2 | Consensus of two observers 3-point scale* | Final diagnosis, patient level |
|----------------|----------------------------------------|-------------|-------------|---------------|------------------|---------------------------------------|---------------------------------------|-------------------------------------------|--------------------------------|
| 1              | Primary staging                        | 7           | 62          | 7             | cT1c             | M0                                    | Equivocal, one lesion                 | Equivocal, one lesion                     | M0                             |
| 2              | Primary staging                        | 11          | 71          | 7             | cT1c             | M0                                    | Equivocal, one lesion                 | Equivocal, one lesion                     | M0                             |
| 3              | Primary staging                        | 79          | 61          | 7             | cT3b             | Equivocal, one lesion                 | M1, one lesion                        | M1, one lesion                            | M1                             |
| 4              | BCR                                    | 0,3         | 75          | 7             | cT1              | Equivocal, one lesion                 | M1, two lesions                       | M1, one lesion                            | M1                             |
| 5              | Primary staging                        | 5,8         | 62          | 7             | cT1c             | Equivocal, one lesion                 | M0                                    | Equivocal, one lesion                     | M0                             |
| 6              | Primary staging                        | 11          | 73          | 7             | cT2a             | M0                                    | Equivocal, one lesion                 | M0                                        | M0                             |
| 7              | Primary staging                        | 6,6         | 69          | 7             | cT1c             | M0                                    | Equivocal, two lesions                | M0                                        | M0                             |
| 8              | Primary staging                        | 6,6         | 69          | 7             | cT1c             | M0                                    | Equivocal, one lesion                 | M0                                        | M0                             |
| 9              | Primary staging                        | 5,1         | 63          | 9             | cT1c             | M0                                    | Equivocal, one lesion                 | M0                                        | M0                             |
| 10             | Primary staging                        | 6,1         | 61          | 7             | cT1c             | M0                                    | Equivocal, two lesions                | M0                                        | M0                             |

|    |                 |     |    |   |      |                 |                                                |                        |    |
|----|-----------------|-----|----|---|------|-----------------|------------------------------------------------|------------------------|----|
| 11 | Primary staging | 6,3 | 60 | 6 | cT2b | M0              | Equivocal, one lesion                          | M0                     | M0 |
| 12 | BCR             | 0,9 | 60 | 8 | cT2  | M0              | M1, one lesion                                 | M1, one lesion         | M0 |
| 13 | BCR             | 5,7 | 78 | 7 | cT2  | M0              | Equivocal, one lesion                          | M0                     | M0 |
| 14 | BCR             | 2   | 72 | 7 | cT2  | M0              | Equivocal, superscan or metabolic bone disease | M0                     | M0 |
| 15 | BCR             | 0,8 | 72 | 7 | cT1  | M0              | Equivocal, one lesion                          | M0                     | M0 |
| 16 | Primary staging | 17  | 68 | 7 | cT1c | M1, two lesions | Equivocal, two lesions                         | Equivocal, two lesions | M0 |
| 17 | BCR             | 0,6 | 55 | 6 | cT1  | M0              | Equivocal, two lesions                         | M0                     | M0 |
| 18 | BCR             | 3,3 | 71 | 7 | cT3  | M0              | Equivocal, one lesion                          | Equivocal, one lesion  | M0 |
| 19 | Primary staging | 10  | 72 | 7 | cT1c | M0              | Equivocal, one lesion                          | M0                     | M0 |

\* Three-point scale: No bone metastasis, equivocal, bone metastasis present.

BCR: biochemical recurrence, M0: No bone metastases, M1: bone metastases present.
